# Supplementary material
Source: ML conference proceedings conference paper supplement (https://openaccess.thecvf.com/content/cvpr_2015/html/Kwon_Data-Driven_Depth_Map_2015_CVPR_paper.html)
Supplement: Supplementary file 2 [file Kwon_Data-Driven_Depth_Map_2015_CVPR_supplemental.zip]

Archive with 4 entries (4 files):
- [Demo_video]cvpr2015_IntelFace.mp4
- [Demo_video]cvpr2015_IntelScene.mp4
- [Demo_video]cvpr2015_kinectscene.mp4
- cvpr15_datadrivedepthmap_final_supple03_opts.pdf
